# Supplementary material for: Association between metformin and neurodegenerative diseases of observational studies: systematic review and meta-analysis
Source: PubMed Central journal article supplement — BMJ Open Diabetes Res Care. 2020 Jul 27;8(1):e001370. doi: 10.1136/bmjdrc-2020-001370 (PMC7390234; doi:10.1136/bmjdrc-2020-001370), 2020-07-27

## Online supplementary material

Table S1: STROBE Statement—checklist of items that should be included

|                           | <b>Item No</b> | <b>Recommendation</b>                                                                                                                           | <b>Page No</b> |
|---------------------------|----------------|-------------------------------------------------------------------------------------------------------------------------------------------------|----------------|
| <b>Title and abstract</b> | 1              | (a) Indicate the study's design with a commonly used term in the title or the abstract                                                          | 1              |
|                           |                | (b) Provide in the abstract an informative and balanced summary of what was done and what was found                                             | 2              |
| <b>Introduction</b>       |                |                                                                                                                                                 |                |
| Background/rationale      | 2              | Explain the scientific background and rationale for the investigation being reported                                                            | 4              |
| Objectives                | 3              | State specific objectives, including any prespecified hypotheses                                                                                | 5              |
| <b>Methods</b>            |                |                                                                                                                                                 |                |
| Study design              | 4              | Present key elements of study design early in the paper                                                                                         | 4              |
| Setting                   | 5              | Describe the setting, locations, and relevant dates, including periods of recruitment, exposure, follow-up, and data collection                 | 5              |
| Participants              | 6              | (a) <i>Cohort study</i> —Give the eligibility criteria, and the sources and methods of selection of participants. Describe methods of follow-up | 5              |

|                              |    |                                                                                                                                                                                                                                                                                                                              |     |
|------------------------------|----|------------------------------------------------------------------------------------------------------------------------------------------------------------------------------------------------------------------------------------------------------------------------------------------------------------------------------|-----|
|                              |    | <p><i>Case-control study</i>—Give the eligibility criteria, and the sources and methods of case ascertainment and control selection. Give the rationale for the choice of cases and controls</p> <p><i>Cross-sectional study</i>—Give the eligibility criteria, and the sources and methods of selection of participants</p> |     |
|                              |    | <p>(b) <i>Cohort study</i>—For matched studies, give matching criteria and number of exposed and unexposed</p> <p><i>Case-control study</i>—For matched studies, give matching criteria and the number of controls per case</p>                                                                                              | 5   |
| Variables                    | 7  | Clearly define all outcomes, exposures, predictors, potential confounders, and effect modifiers. Give diagnostic criteria, if applicable                                                                                                                                                                                     | 5-6 |
| Data sources/<br>measurement | 8* | For each variable of interest, give sources of data and details of methods of assessment (measurement). Describe comparability of assessment methods if there is more than one group                                                                                                                                         | NA  |
| Bias                         | 9  | Describe any efforts to address potential sources of bias                                                                                                                                                                                                                                                                    | 6   |
| Study size                   | 10 | Explain how the study size was arrived at                                                                                                                                                                                                                                                                                    | 5   |
| Quantitative<br>variables    | 11 | Explain how quantitative variables were handled in the analyses. If applicable, describe which groupings were chosen and why                                                                                                                                                                                                 | 5   |
| Statistical<br>methods       | 12 | (a) Describe all statistical methods, including those used to control for confounding                                                                                                                                                                                                                                        | 5-6 |
|                              |    | (b) Describe any methods used to examine subgroups and interactions                                                                                                                                                                                                                                                          | 5-6 |
|                              |    | (c) Explain how missing data were addressed                                                                                                                                                                                                                                                                                  | NA  |
|                              |    | (d) <i>Cohort study</i> —If applicable, explain how loss to follow-up was addressed                                                                                                                                                                                                                                          | NA  |
|                              |    | <i>Case-control study</i> —If applicable, explain how matching of cases and controls was addressed                                                                                                                                                                                                                           |     |

|  |  |                                                                                                              |     |
|--|--|--------------------------------------------------------------------------------------------------------------|-----|
|  |  | <i>Cross-sectional study</i> —If applicable, describe analytical methods taking account of sampling strategy |     |
|  |  | (e) Describe any sensitivity analyses                                                                        | 5-6 |

| <b>Results</b>   |     |                                                                                                                                                                                                              |         |
|------------------|-----|--------------------------------------------------------------------------------------------------------------------------------------------------------------------------------------------------------------|---------|
| Participants     | 13* | (a) Report numbers of individuals at each stage of study—eg numbers potentially eligible, examined for eligibility, confirmed eligible, included in the study, completing follow-up, and analysed            | 8-9     |
|                  |     | (b) Give reasons for non-participation at each stage                                                                                                                                                         | NA      |
|                  |     | (c) Consider use of a flow diagram                                                                                                                                                                           | Fig 1   |
| Descriptive data | 14* | (a) Give characteristics of study participants (eg demographic, clinical, social) and information on exposures and potential confounders                                                                     | 8-9     |
|                  |     | (b) Indicate number of participants with missing data for each variable of interest                                                                                                                          | 8-9     |
|                  |     | (c) <i>Cohort study</i> —Summarise follow-up time (eg, average and total amount)                                                                                                                             | 8-9     |
| Outcome data     | 15* | <i>Cohort study</i> —Report numbers of outcome events or summary measures over time                                                                                                                          | 8-9     |
|                  |     | <i>Case-control study</i> —Report numbers in each exposure category, or summary measures of exposure                                                                                                         | 8-9     |
|                  |     | <i>Cross-sectional study</i> —Report numbers of outcome events or summary measures                                                                                                                           | 8-9     |
| Main results     | 16  | (a) Give unadjusted estimates and, if applicable, confounder-adjusted estimates and their precision (eg, 95% confidence interval). Make clear which confounders were adjusted for and why they were included | Fig 3-4 |
|                  |     | (b) Report category boundaries when continuous variables were categorized                                                                                                                                    | NA      |

|                          |    |                                                                                                                                                                            |       |
|--------------------------|----|----------------------------------------------------------------------------------------------------------------------------------------------------------------------------|-------|
|                          |    | (c) If relevant, consider translating estimates of relative risk into absolute risk for a meaningful time period                                                           | NA    |
| Other analyses           | 17 | Report other analyses done—eg analyses of subgroups and interactions, and sensitivity analyses                                                                             | 11-12 |
| <b>Discussion</b>        |    |                                                                                                                                                                            |       |
| Key results              | 18 | Summarise key results with reference to study objectives                                                                                                                   | 13-14 |
| Limitations              | 19 | Discuss limitations of the study, taking into account sources of potential bias or imprecision. Discuss both direction and magnitude of any potential bias                 | 12    |
| Interpretation           | 20 | Give a cautious overall interpretation of results considering objectives, limitations, multiplicity of analyses, results from similar studies, and other relevant evidence | 15    |
| Generalisability         | 21 | Discuss the generalisability (external validity) of the study results                                                                                                      | 15-16 |
| <b>Other information</b> |    |                                                                                                                                                                            |       |
| Funding                  | 22 | Give the source of funding and the role of the funders for the present study and, if applicable, for the original study on which the present article is based              | 18    |

\*Give information separately for cases and controls in case-control studies and, if applicable, for exposed and unexposed groups in cohort and cross-sectional studies.

Table S2 : The cohorts studies assessed by NEWCASTLE - OTTAWA QUALITY ASSESSMENT SCALE

|                       | Author Year                                                                                                                                       | Cheng<br>2014 | Wahlqv<br>ist2012 | Hsu<br>2011 | Kuan<br>2017 | Ng<br>2014 | Heneka<br>2015 | Braked<br>al<br>2017 | Orkaby<br>2017 | Wang<br>2017 | Weinst<br>ein<br>2019 | Koo<br>2017 | Huang<br>2014 | Tseng<br>2019 |
|-----------------------|---------------------------------------------------------------------------------------------------------------------------------------------------|---------------|-------------------|-------------|--------------|------------|----------------|----------------------|----------------|--------------|-----------------------|-------------|---------------|---------------|
| Selec<br>tion         | Representativeness of the<br>exposed cohort                                                                                                       | +             | +                 | +           | +            | -          | +              | +                    | +              | +            | +                     | +           | +             | +             |
|                       | Selection of the non exposed<br>cohort                                                                                                            | +             | +                 | +           | +            | -          | +              | +                    | +              | +            | +                     | +           | +             | +             |
|                       | Ascertainment of exposure(secure<br>record or structured interview)                                                                               | +             | +                 | +           | +            | +          | +              | +                    | +              | +            | +                     | +           | +             | +             |
|                       | Demonstration that outcome of<br>interest was not present at start of<br>study                                                                    | +             | +                 | +           | +            | -          | +              | +                    | +              | +            | +                     | +           | +             | +             |
| Com<br>parab<br>ility | Study controls for the most<br>important factor                                                                                                   | -             | -                 | -           | -            | +          | -              | -                    | +              | +            | +                     | -           | -             | -             |
|                       | study controls for any additional<br>factor (This criteria could be<br>modified to indicate specific<br>control for a second important<br>factor) | +             | +                 | +           | +            | +          | +              | +                    | +              | +            | +                     | +           | +             | +             |

|         |                                                 |          |          |          |          |          |          |          |          |          |          |          |          |          |
|---------|-------------------------------------------------|----------|----------|----------|----------|----------|----------|----------|----------|----------|----------|----------|----------|----------|
| Outcome | Assessment of outcome                           | +        | +        | +        | +        | +        | +        | +        | +        | +        | +        | +        | +        | +        |
|         | Was follow-up long enough for outcomes to occur | +        | +        | +        | +        | +        | +        | +        | +        | +        | +        | -        | +        | +        |
|         | Adequacy of follow up of cohorts                | -        | -        | -        | -        | -        | -        | -        | -        | -        | -        | -        | -        | -        |
|         | <b>Study quality score</b>                      | <b>7</b> | <b>7</b> | <b>7</b> | <b>7</b> | <b>5</b> | <b>7</b> | <b>7</b> | <b>8</b> | <b>8</b> | <b>8</b> | <b>6</b> | <b>7</b> | <b>7</b> |

Table S3 : Three cross-sectional studies evaluated by Agency for Healthcare Research and Quality methodology checklist

| Author Year                                                                                                                         | 2019<br>Porter | 2016<br>Liccini | 2015<br>Yokoyama |
|-------------------------------------------------------------------------------------------------------------------------------------|----------------|-----------------|------------------|
| 1) Define the source of information (survey, record review)                                                                         | +              | +               | +                |
| 2) List inclusion and exclusion criteria for exposed and unexposed subjects (cases and controls) or refer to previous publications  | +              | +               | +                |
| 3) Indicate time period used for identifying patients                                                                               | +              | +               | +                |
| 4) Indicate whether or not subjects were consecutive if not population-based                                                        | +              | -               | -                |
| 5) Indicate if evaluators of subjective components of study were masked to other aspects of the status of the participants          | -              | -               | -                |
| 6) Describe any assessments undertaken for quality assurance purposes (e.g., test/retest of primary outcome measurements)           | +              | -               | -                |
| 7) Explain any patient exclusions from analysis                                                                                     | +              | +               | -                |
| 8) Describe how confounding was assessed and/or controlled.                                                                         | +              | +               | +                |
| 9) If applicable, explain how missing data were handled in the analysis                                                             | -              | -               | -                |
| 10) Summarize patient response rates and completeness of data collection                                                            | -              | -               | -                |
| 11) Clarify what follow-up, if any, was expected and the percentage of patients for which incomplete data or follow-up was obtained | -              | -               | -                |
| <b>Study quality score</b>                                                                                                          | 7              | 5               | 4                |

Table S4 : The case-control studies assessed by NEWCASTLE - OTTAWA QUALITY ASSESSMENT SCALE

| Author Year | Imfeld<br>2012 | Bohlken<br>2018 | Moore<br>2013 |
|-------------|----------------|-----------------|---------------|
|             |                |                 |               |

|               |                                                     |          |          |          |
|---------------|-----------------------------------------------------|----------|----------|----------|
| Selection     | Is the case definition adequate                     | +        | +        | +        |
|               | Representativeness of the cases                     | +        | +        | +        |
|               | Selection of Controls                               | +        | +        | +        |
|               | Definition of Controls                              | +        | +        | +        |
| Comparability | Study controls for the most important factor        | -        | +        | +        |
|               | Study controls for any additional factor            | +        | +        | +        |
| Exposure      | Ascertainment of exposure                           | +        | +        | +        |
|               | Same method of ascertainment for cases and controls | +        | +        | +        |
|               | Non-Response rate                                   | -        | -        | -        |
|               | <b>Study quality score</b>                          | <b>7</b> | <b>8</b> | <b>8</b> |



Table S5 The confounding factors adjusted for in each study

| Study                        | Confounding Variables adjusted for                                                                                                                                                            |
|------------------------------|-----------------------------------------------------------------------------------------------------------------------------------------------------------------------------------------------|
| Porter 2019 <sup>22</sup>    | Age, GFR, education, VitB 12 and PLP                                                                                                                                                          |
| Cheng 2014 <sup>13</sup>     | Age, gender, hypertension, hyperlipidemia, and cerebrovascular disease.                                                                                                                       |
| Wahlqvist 2012 <sup>11</sup> | age, gender, locality, level of care, comorbidity index, monthly income                                                                                                                       |
| Hsu 2011 <sup>12</sup>       | Age, gender, type of smoke and CCI score                                                                                                                                                      |
| Kuan 2017 <sup>7</sup>       | Age, gender, CCI score; Adapted Diabetes, CSI, comorbidities of HTN, CKD, hyperlipidemia, heart failure, arrhythmia, stroke, head injury, CAD, ADD other than Met, anti-HTN drug, and statin. |
| Ng 2014 <sup>16</sup>        | Age, gender, education, depressive symptoms, HTN, CAD, stroke, CKD, other medical co-morbidities , other ADD, APOE-4 carrier status, FBG, BMI, duration of follow up and duration of diabetes |
| Imfeld 2012 <sup>23</sup>    | Age, gender, GP, ADD, smoking, BMI, HTN, dyslipidemia, and use of ACEI and statins                                                                                                            |
| Heneka 2015 <sup>17</sup>    | Age, gender, CAD comorbidities                                                                                                                                                                |
| Moore 2013 <sup>24</sup>     | Age, gender, history of depression, education, VitB12                                                                                                                                         |

|                             |                                                                                                                                                                                                                                        |
|-----------------------------|----------------------------------------------------------------------------------------------------------------------------------------------------------------------------------------------------------------------------------------|
| Brakedal 2017 <sup>8</sup>  | Age, gender                                                                                                                                                                                                                            |
| Orkaby 2017 <sup>18</sup>   | race, gender, BMI, HbA1c, region, eGFR and comorbidities of CAD, HF, AF, HTN, hyperlipidemia, peripheral artery disease, cerebrovascular disease, eye disease, cancer, arthritis, major psychiatric disease and number of drug classes |
| Liccini 2016 <sup>21</sup>  | age, gender, education and HbA1c                                                                                                                                                                                                       |
| Yokoyama 2015 <sup>20</sup> | Age, gender, BMI, current smoker, duration of diabetes, hypertension, dyslipidemia, and history of CAD and stroke                                                                                                                      |
| Wang 2017 <sup>19</sup>     | Age, ethnicity, CCI, BMI, HbA1c, statin use and propensity, scores of metformin use                                                                                                                                                    |
| Weinstein 2019 <sup>9</sup> | Age, gender, education, interval between examination, physical activity, HTN, CVD, stroke, lipid, smoking, depression, and BMI                                                                                                         |
| Koo 2017 <sup>10</sup>      | Age, gender, education, dementia medication                                                                                                                                                                                            |
| Bohlken 2018 <sup>25</sup>  | HbA1c, index date, DM duration, co-diagnoses and co-therapies                                                                                                                                                                          |
| Huang 2014 <sup>14</sup>    | age, gender, comorbidities (HTN, hyperlipidemia, stroke, coronary artery disease, arrhythmia, heart failure and depression), geographic area and urbanization status                                                                   |

|                          |                                                                                                                                                   |
|--------------------------|---------------------------------------------------------------------------------------------------------------------------------------------------|
| Tseng 2019 <sup>15</sup> | Propensity score matched including age, gender, occupation, living region, major comorbidities and other medications commonly used in DM patients |
|--------------------------|---------------------------------------------------------------------------------------------------------------------------------------------------|

Abbreviations: GFR, Glomerular Filtration Rate; SU, sulfonylurea; CCI, Charlson comorbidity index; CSI, Complications Severity Index; HTN, hypertension; CKD, chronic kidney disease; CAD coronary artery disease; ADD, Antidiabetes drug; FBG fasting blood glucose, BMI body mass index; ACE-I angiotensin-converting enzyme inhibitors

Table S6: Subgroup Analysis to Examine Sources of Heterogeneity Observed in Summary Estimate

| Subgroup analysis | No. of studies | Total no. of subjects | Adjusted OR | 95% CI    | Tests of heterogeneity |                    | Heterogeneity between subgroups (P) |
|-------------------|----------------|-----------------------|-------------|-----------|------------------------|--------------------|-------------------------------------|
|                   |                |                       |             |           | P                      | I <sup>2</sup> (%) |                                     |
| subtypes of ND    |                |                       |             |           |                        |                    | <0.001                              |
| PD                | 3              | 115805                | 1.66        | 1.14-2.42 | 0.04                   | 68.5               |                                     |
| AD                | 3              | 183510                | 0.90        | 0.47-1.73 | 0.06                   | 65.6               |                                     |
| Dementia          | 17             |                       | 0.96        | 0.85-1.09 | <0.001                 | 83.1               |                                     |

|                          |    |        |      |           |        |      |       |
|--------------------------|----|--------|------|-----------|--------|------|-------|
| Race                     |    |        |      |           |        |      | 0.174 |
| Asiar                    | 11 | 100541 | 0.97 | 0.69-1.36 | <0.001 | 90.3 |       |
| Caucasiar                | 12 | 198774 | 1.04 | 0.93-1.15 | <0.001 | 71.1 |       |
| Study design             |    |        |      |           |        |      | 0.716 |
| Cohor                    | 17 | 264670 | 1.04 | 0.89-1.21 | <0.001 | 87.1 |       |
| Cross-sectiona           | 3  | 3825   | 0.77 | 0.41-1.46 | 0.01   | 79.9 |       |
| Case-contro              | 3  | 30820  | 1.33 | 0.82-2.16 | 0.01   | 77.2 |       |
| Study quality assessment |    |        |      |           |        |      |       |
| Low quality              | 5  | 4947   | 0.86 | 0.5-1.48  | 0.001  | 79.1 | 0.894 |
| High quality             | 18 | 294368 | 1.07 | 0.94-1.21 | <0.001 | 86.3 |       |

Table S7: Effect of study variables by meta-regression

|                |                 | Incidence of ND |             |       |
|----------------|-----------------|-----------------|-------------|-------|
|                |                 | Exp(b)          | 95% CI      | p     |
| Race           | Caucasian       | 1.066           | 0.731-1.57  | 0.727 |
|                | Asian           | 0.910           | 0.648-1.277 | 0.568 |
| Study design   | case-control    | 1.007           | 0.353-2.869 | 0.989 |
|                | cohort          | 0.970           | 0.354-2.656 | 0.951 |
|                | Cross-sectional | 0.979           | 0.363-2.641 | 0.965 |
| Subtypes of ND | AD              | 0.688           | 0.165-2.866 | 0.591 |
|                | Dementia        | 0.551           | 0.245-1.240 | 0.141 |
|                | PD              | 1.695           | 0.764-3.757 | 0.182 |

FigS1: Sensitivity Analysis plot

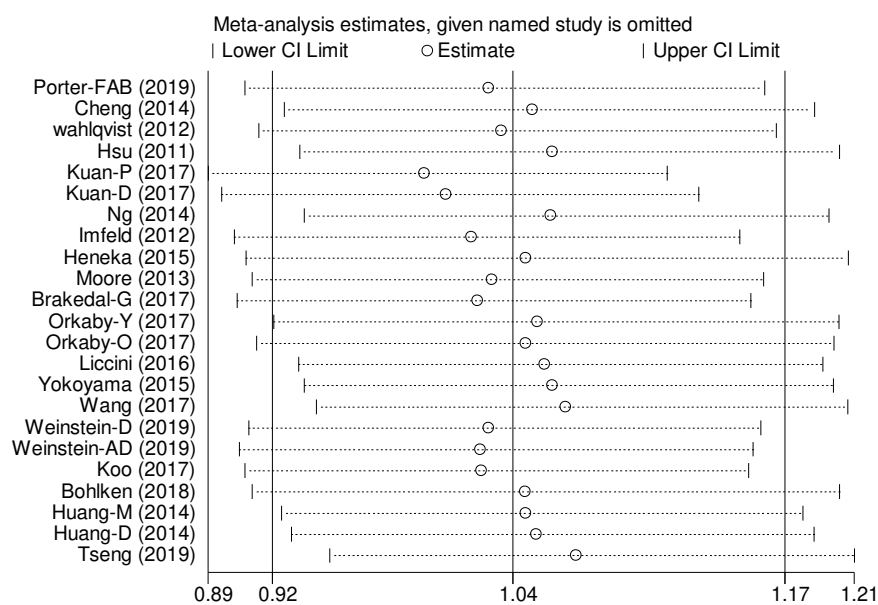

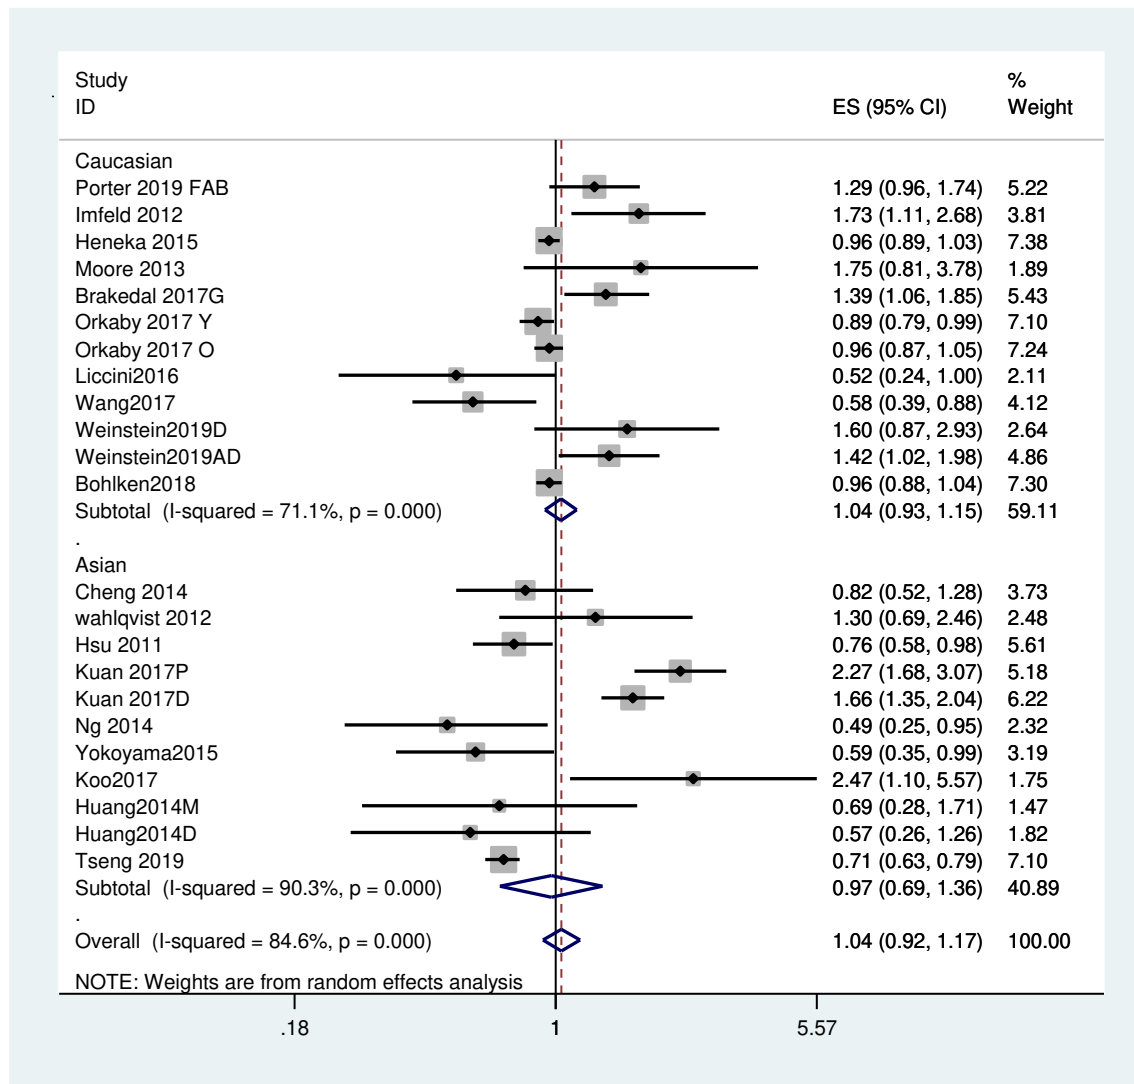

Fig S2 Forest Plot for Subgroup analysis based on different race

Fig S3 Forest Plot for Subgroup analysis based on different study design

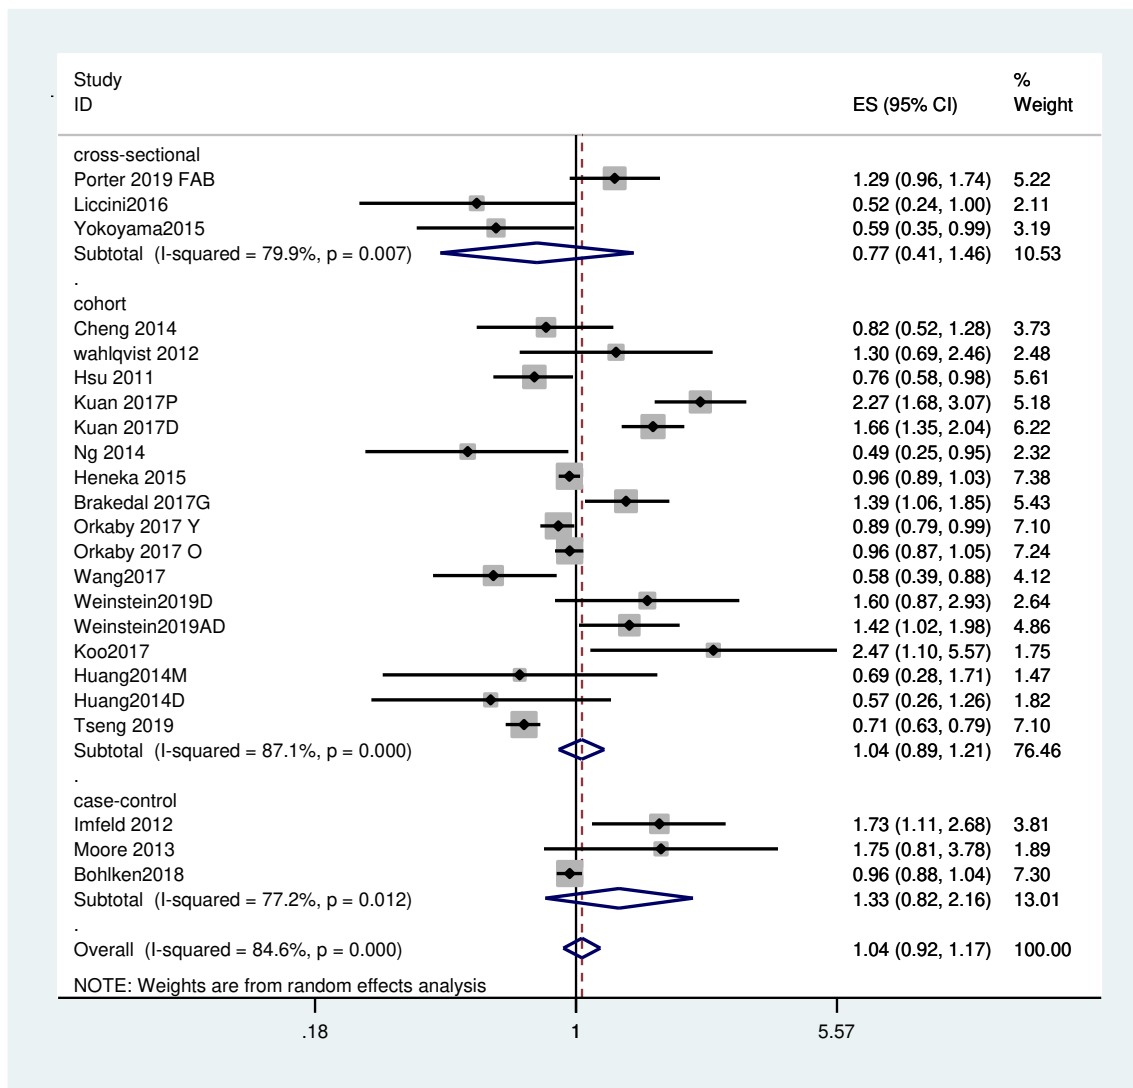

Supplement: bmjdrc-2020-001370supp001.pdf [file bmjdrc-2020-001370supp001.pdf]
